# Supplementary material for: CRISPR-Cas9-based mutagenesis frequently provokes on-target mRNA misregulation
Source: PubMed Central journal article supplement (PMC6731291; doi:10.1038/s41467-019-12028-5), 2019-09-06
Supplement: 41467_2019_12028_MOESM4_ESM.pdf [file 41467_2019_12028_MOESM4_ESM.pdf]

## **Description of Additional Supplementary Files**

### **Supplementary Data 1**

Description: Sequencing results for cDNA transcripts.
