# Supplementary material for: CRISPR-Cas9-based mutagenesis frequently provokes on-target mRNA misregulation
Source: PubMed Central journal article supplement (PMC6731291; doi:10.1038/s41467-019-12028-5), 2019-09-06
Supplement: 41467_2019_12028_MOESM6_ESM.pdf [file 41467_2019_12028_MOESM6_ESM.pdf]

# **CRISPR/Cas9-based mutagenesis frequently provokes on-target mRNA misregulation**

Rubina Tuladhar, Yunku Yeu, John Tyler Piazza, Zhen Tan, Jean Rene Clemenceau, Xiaofeng Wu, Quinn Barrett, Jeremiah Herbert, David H. Mathews, James Kim, Tae Hyun Hwang, and Lawrence Lum.

Figure 1B

Western blot

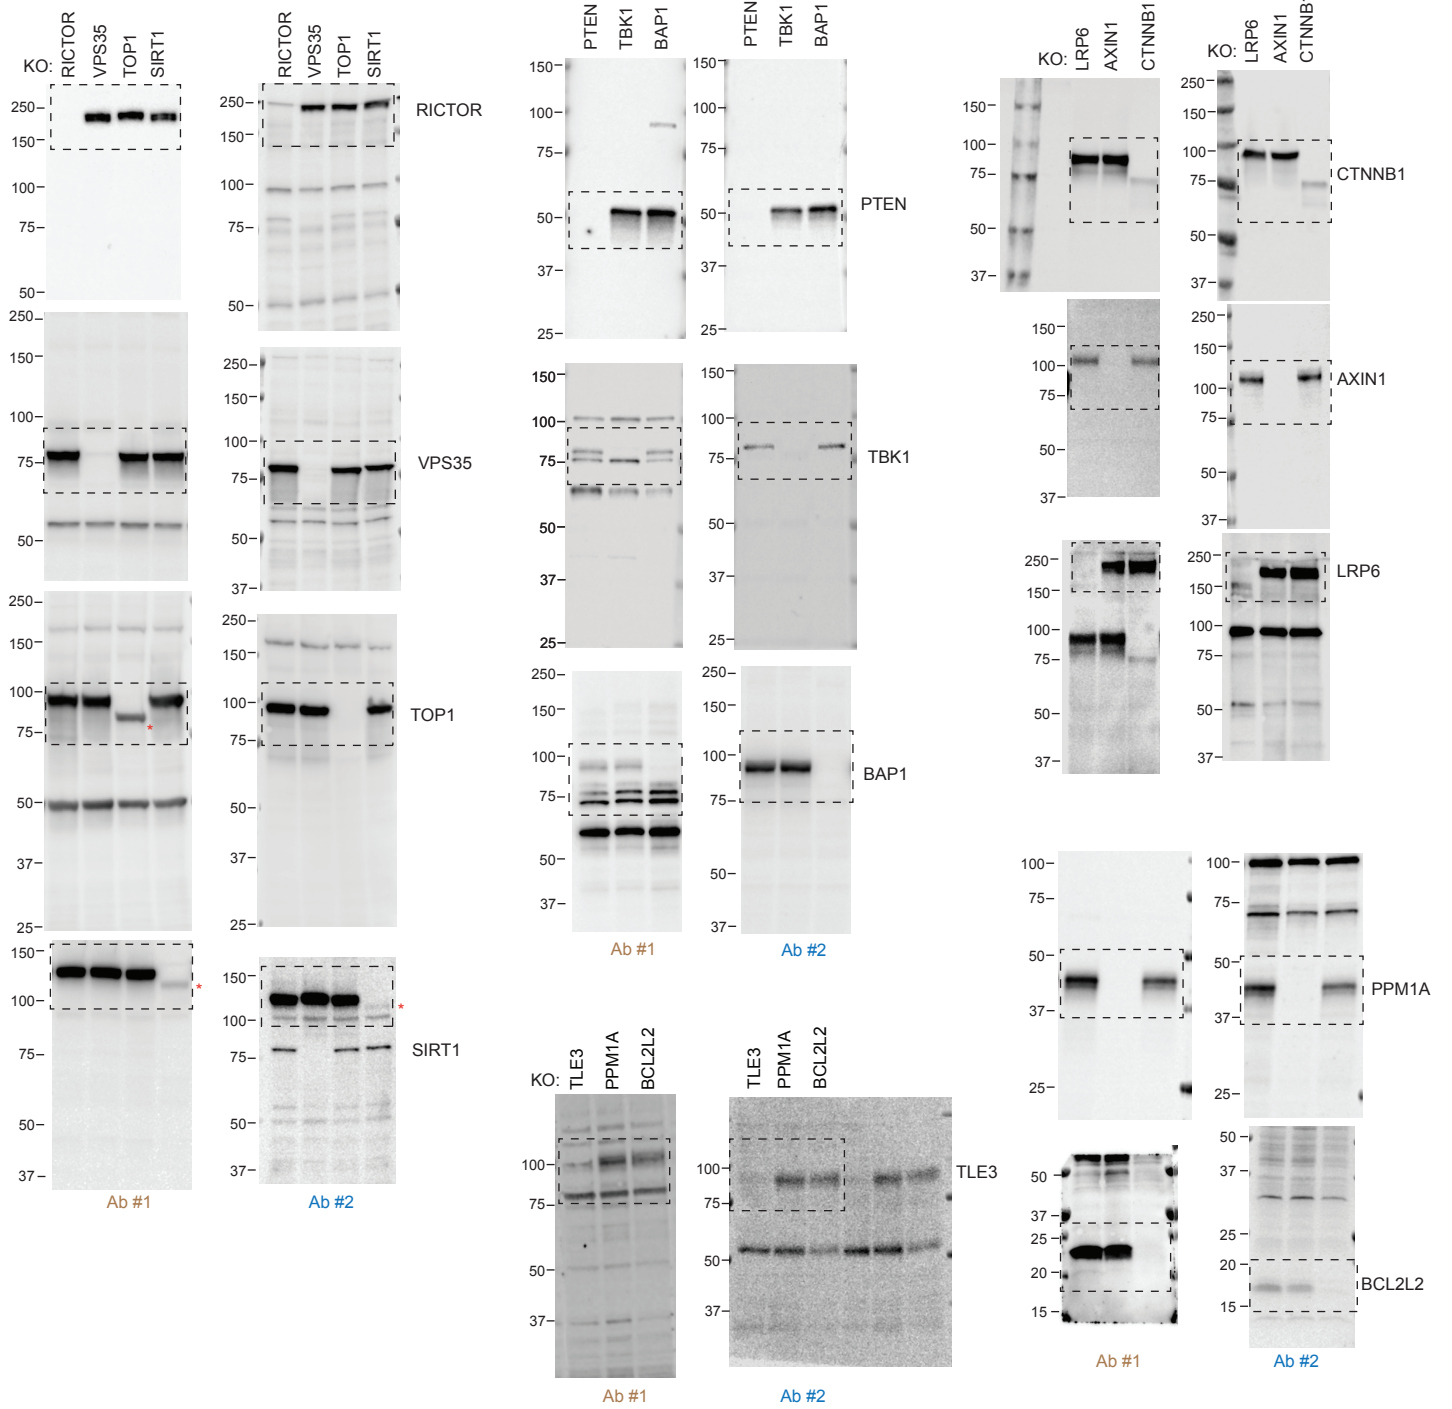

**Figure 1C**

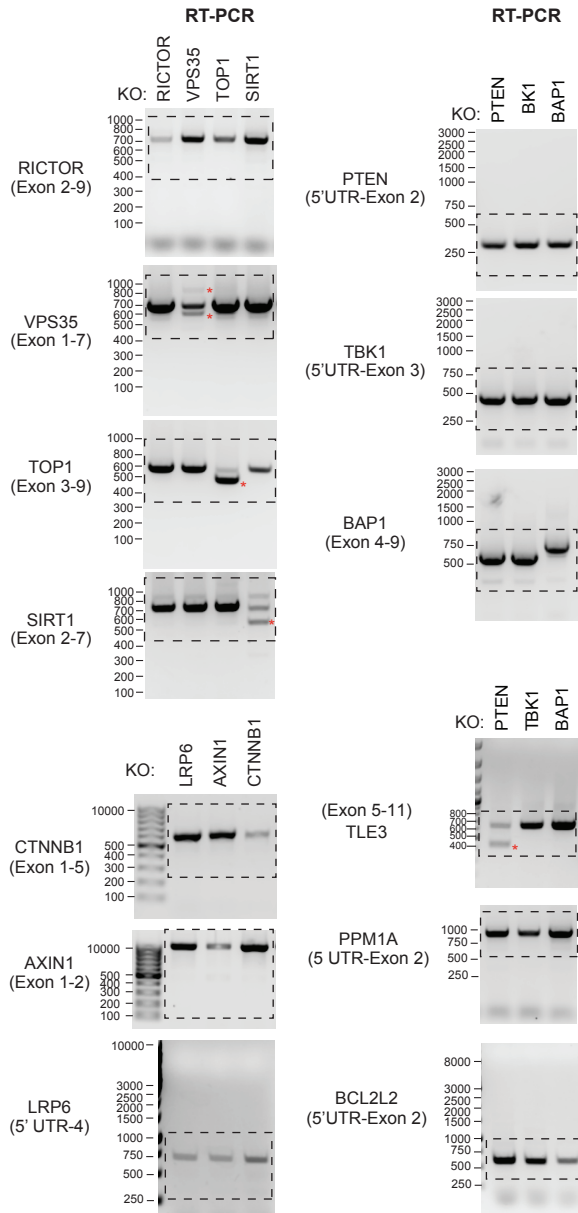

**Figure 2A**

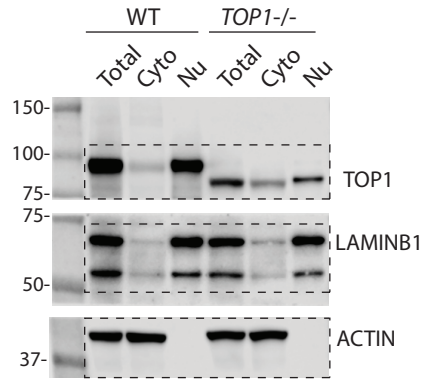

**Figure 2B**

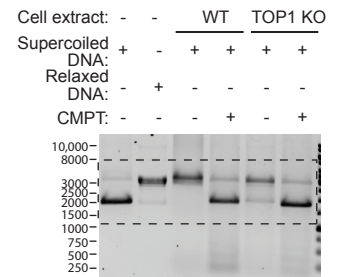

**Figure 3B**

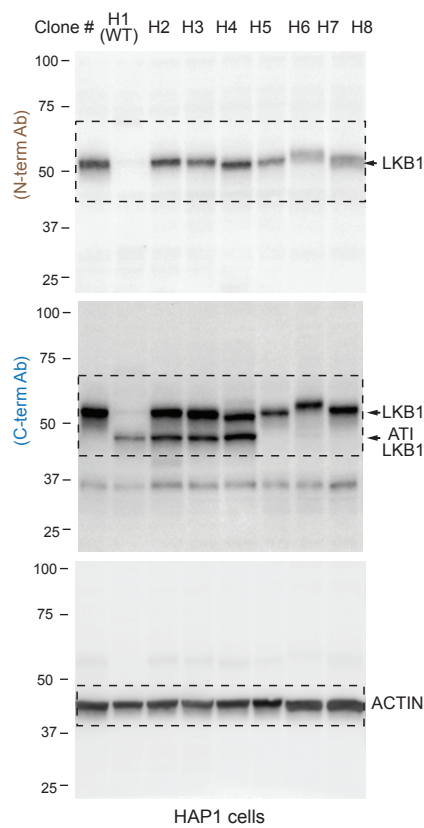

**Figure 3C**

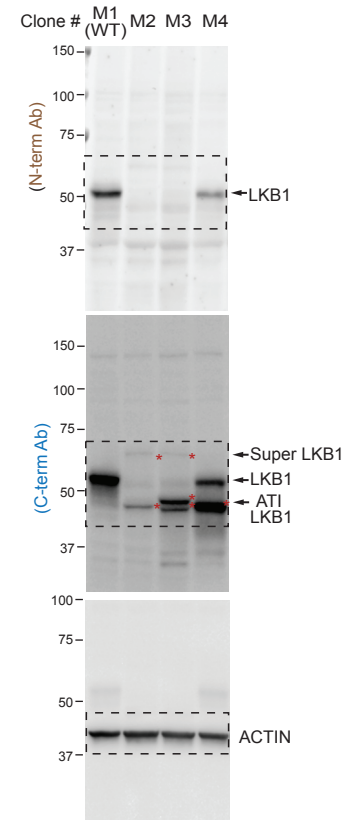

**Figure 3E**

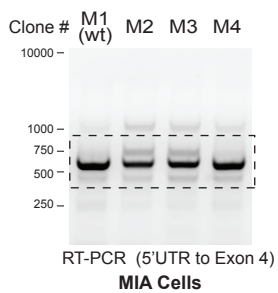

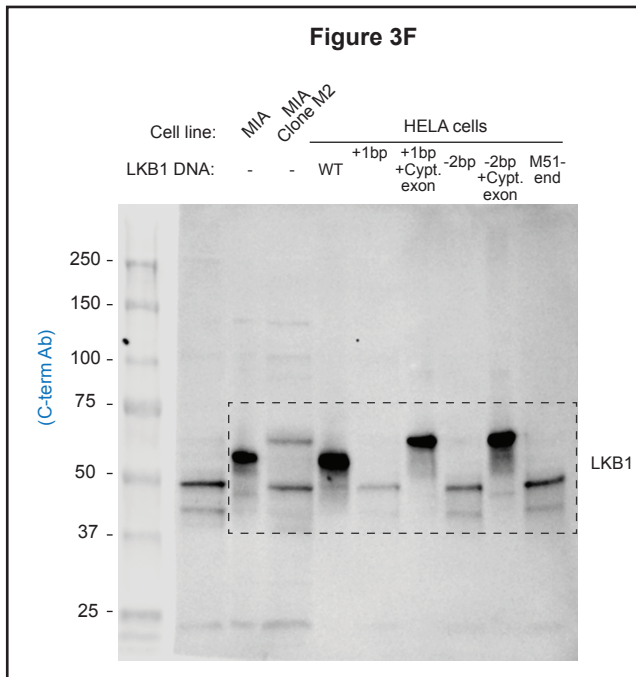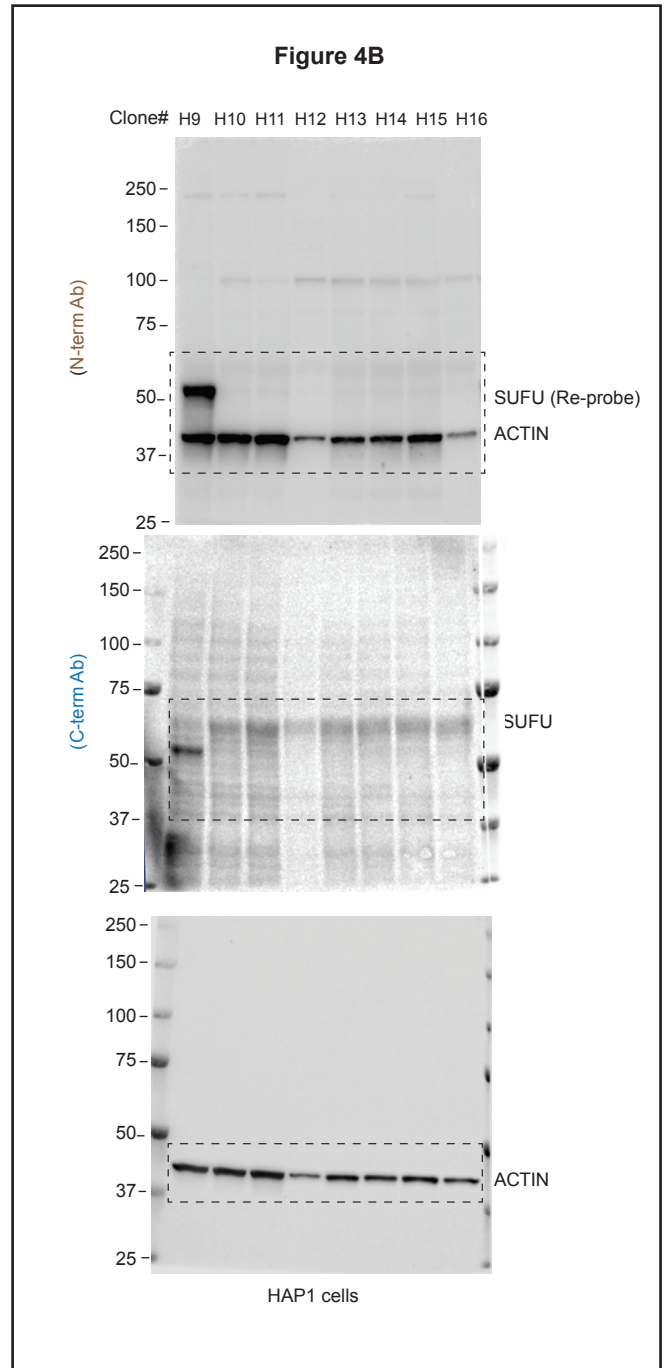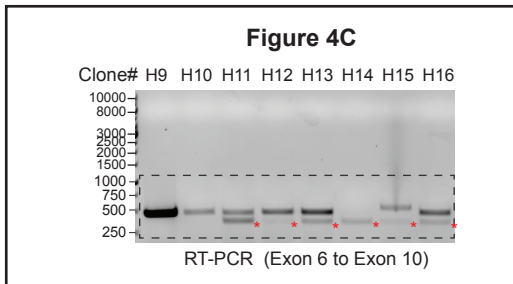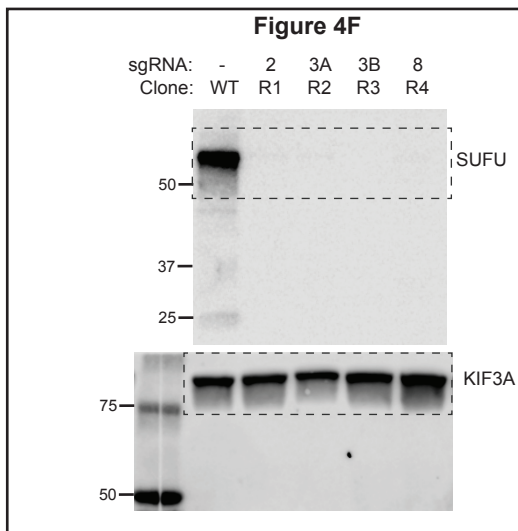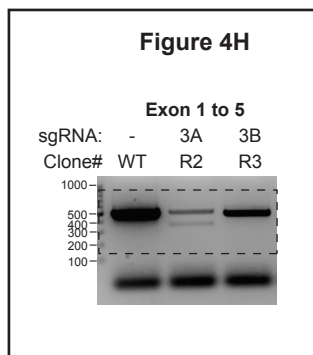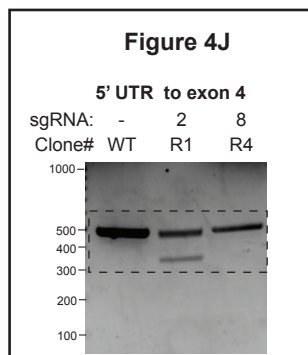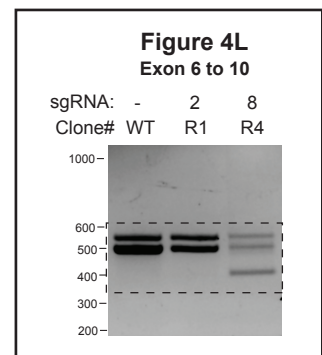



**Figure 5D**

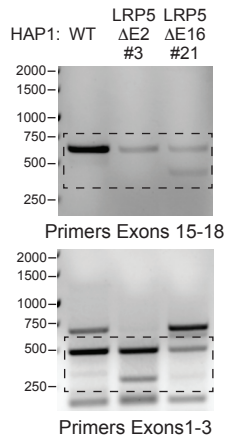

**Figure 5E**

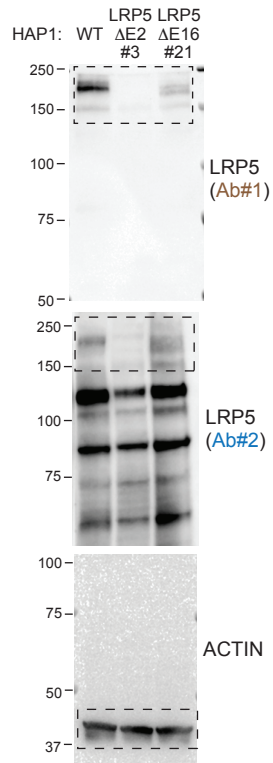

**Figure 5F**

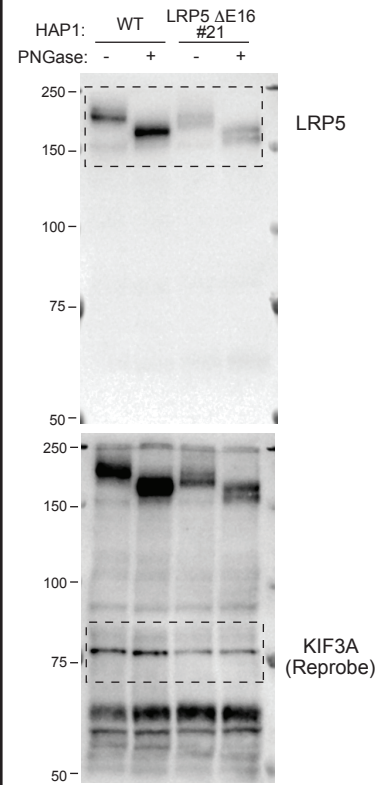

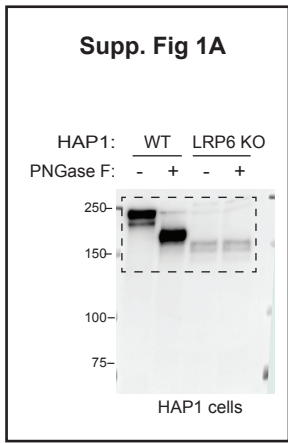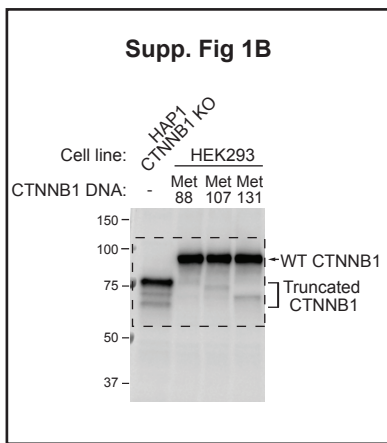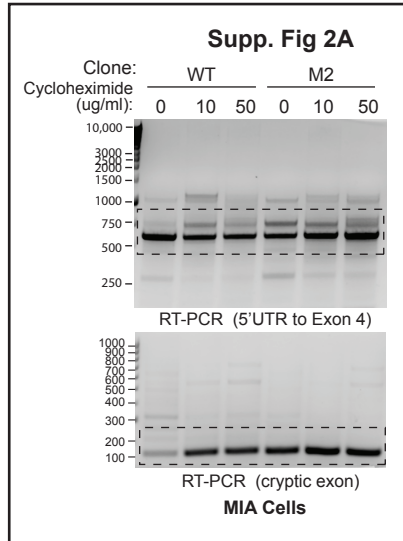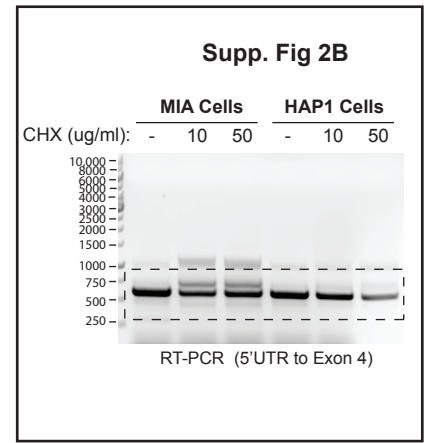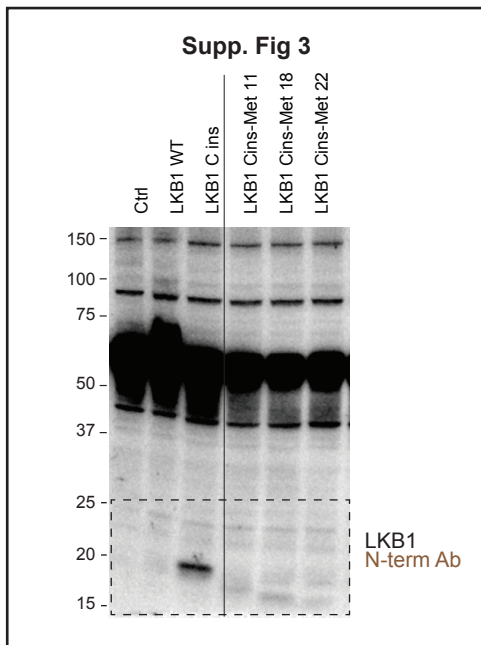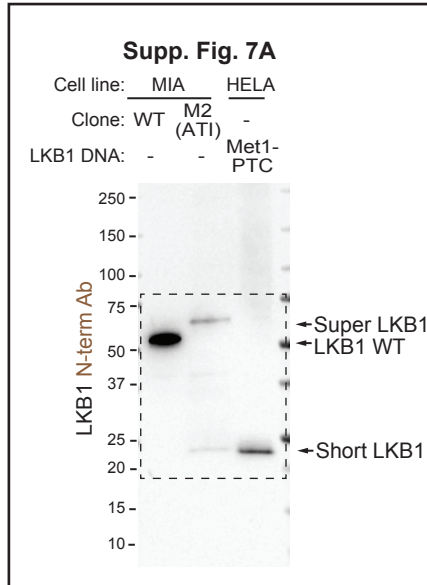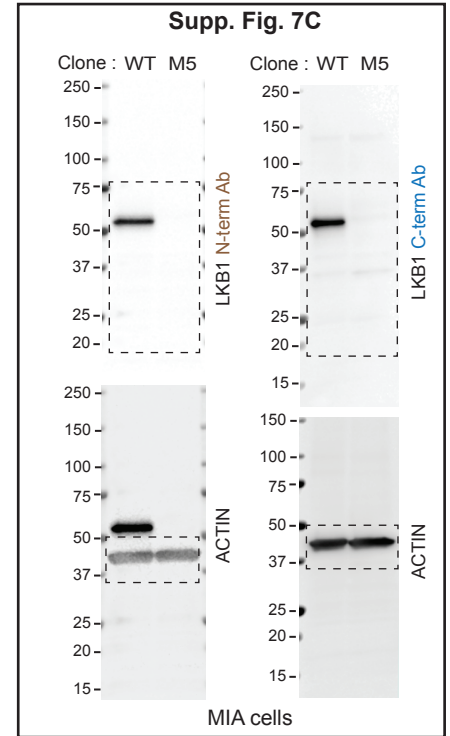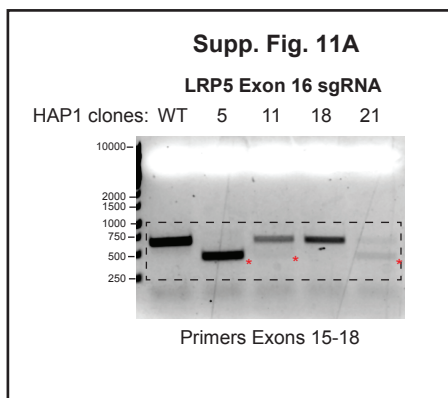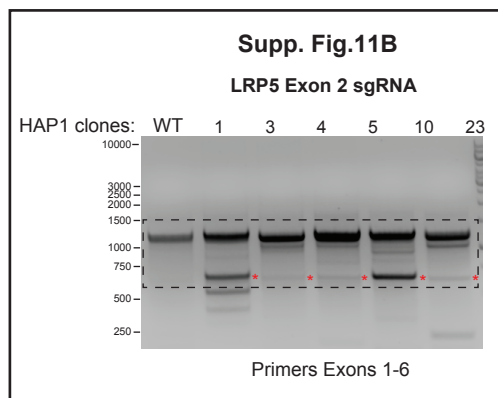

Raw data for bar graph in Figure 5H.

| WT Cells |        |               | LRP5 $\Delta$ E2 #3 |        |               | LRP5 $\Delta$ E16 #21 |        |               |
|----------|--------|---------------|---------------------|--------|---------------|-----------------------|--------|---------------|
| DMSO     | PORCNI | TNKS <i>i</i> | DMSO                | PORCNI | TNKS <i>i</i> | DMSO                  | PORCNI | TNKS <i>i</i> |
| 25269    | 22854  | 2488          | 3539                | 5208   | 864           | 17369                 | 12000  | 2354          |
| 30984    | 20195  | 2725          | 2836                | 2583   | 876           | 13351                 | 13770  | 2647          |
| 30401    | 21896  | 5106          | 1880                | 3350   | 649           | 14586                 | 6806   | 2227          |
